# Supplementary material for: Red meat intake and risk of coronary heart disease among US men: prospective cohort study
Source: PubMed Central journal article supplement — BMJ. 2020 Dec 2;371:m4141. doi: 10.1136/bmj.m4141 (PMC8030119; doi:10.1136/bmj.m4141), 2020-12-02
Supplement: alsl060281.ww.pdf [file alsl060281.ww.pdf]

## Red Meat Intake and Risk of Coronary Heart Disease Among US Men

Laila Al-Shaar,<sup>1</sup> postdoctoral research fellow, Ambika Satija,<sup>1</sup> postdoctoral research fellow, Dong D Wang,<sup>1,2</sup> member of the faculty of medicine, Eric B Rimm,<sup>1,2,3</sup> professor of epidemiology and nutrition, Stephanie A Smith-Warner,<sup>1,3</sup> senior lecturer, Meir J Stampfer,<sup>1,2,3</sup> professor of epidemiology and nutrition, Frank B Hu,<sup>1,2,3</sup> professor of epidemiology and nutrition, Walter C Willett(<https://orcid.org/0000-0003-1458-7597>),<sup>1,2,3</sup> professor of epidemiology and nutrition

<sup>1</sup>Department of Nutrition, Harvard TH Chan School of Public Health, 655 Huntington Avenue, Boston, MA 02115, USA

<sup>2</sup>Channing Division of Network Medicine, Department of Medicine, Brigham and Women's Hospital, Harvard Medical School, Boston, MA, USA

<sup>3</sup>Department of Epidemiology, Harvard TH Chan School of Public Health, Boston, MA, USA

### Correspondence to:

Walter C. Willett, MD, Dr.PH

Department of Nutrition

Harvard T.H. Chan School of Public Health,

655 Huntington Avenue, Boston, MA 02115, USA

Phone: 617.432.4680

Email: [wwillett@hsph.harvard.edu](mailto:wwillett@hsph.harvard.edu)

### Supplementary Table 1: Serving sizes of major protein sources on Food Frequency questionnaires in the Health Professionals Follow up Study, 1986 - 2014.

| Food group  | Constituent food items                                                                                                                        |
|-------------|-----------------------------------------------------------------------------------------------------------------------------------------------|
| Red meat    |                                                                                                                                               |
| Processed   | Beef or pork hot dogs<br>Bacon<br>Salami, bologna, or other processed meat sandwiches<br>Other processed meats, e.g., sausage, kielbasa, etc. |
| Unprocessed | Hamburger, Lean or extra lean                                                                                                                 |

|                      |                                                                                                                                                                                                                                                                                                                                                                                      |
|----------------------|--------------------------------------------------------------------------------------------------------------------------------------------------------------------------------------------------------------------------------------------------------------------------------------------------------------------------------------------------------------------------------------|
|                      | Hamburger, Regular<br>Beef, pork, or lamb as a sandwich or mixed dish, e.g., stew, casserole, lasagna, frozen dinners, etc.<br>Pork as a main dish, e.g., ham or chops<br>Beef or lamb as a main dish, e.g., steak, roast                                                                                                                                                            |
| <hr/>                |                                                                                                                                                                                                                                                                                                                                                                                      |
| Poultry              |                                                                                                                                                                                                                                                                                                                                                                                      |
| <hr/>                |                                                                                                                                                                                                                                                                                                                                                                                      |
| Unprocessed          | Chicken/turkey sandwich or frozen dinner<br>Other chicken or turkey, with skin -including ground<br>Other chicken or turkey, without skin                                                                                                                                                                                                                                            |
| <hr/>                |                                                                                                                                                                                                                                                                                                                                                                                      |
| Fish                 |                                                                                                                                                                                                                                                                                                                                                                                      |
| <hr/>                |                                                                                                                                                                                                                                                                                                                                                                                      |
|                      | Canned tuna fish<br>Breaded fish cakes, pieces, or fish sticks<br>Other fish, e.g., cod, haddock, halibut<br>Dark meat fish, e.g. mackerel, salmon, sardines, bluefish, swordfish                                                                                                                                                                                                    |
| <hr/>                |                                                                                                                                                                                                                                                                                                                                                                                      |
| Regular Eggs         | Regular eggs including yolk                                                                                                                                                                                                                                                                                                                                                          |
| <hr/>                |                                                                                                                                                                                                                                                                                                                                                                                      |
| Dairy                |                                                                                                                                                                                                                                                                                                                                                                                      |
| <hr/>                |                                                                                                                                                                                                                                                                                                                                                                                      |
| High-fat             | Whole milk<br>Cream, e.g., coffee, sour (exclude fat free)<br>Regular ice cream<br>Cottage or ricotta cheese<br>Cream cheese<br>Other cheese Regular, e.g., American, cheddar, etc., plain or as part of a dish                                                                                                                                                                      |
| <hr/>                |                                                                                                                                                                                                                                                                                                                                                                                      |
| Low-fat              | Skim milk<br>1 or 2 % milk<br>Frozen yogurt, sherbet, sorbet or low-fat ice cream<br>Plain Yogurt<br>Artificially sweetened (e.g., light peach) Yogurt<br>Sweetened (e.g., strawberry, vanilla) Yogurt<br>Other cheese Lowfat or Lite, e.g., American, cheddar, etc., plain or as part of a dish<br>Other cheese fat-free, e.g., American, cheddar, etc., plain or as part of a dish |
| <hr/>                |                                                                                                                                                                                                                                                                                                                                                                                      |
| Nuts                 |                                                                                                                                                                                                                                                                                                                                                                                      |
| <hr/>                |                                                                                                                                                                                                                                                                                                                                                                                      |
|                      | Peanuts<br>Walnuts<br>Other Nuts<br>Peanut Butter                                                                                                                                                                                                                                                                                                                                    |
| <hr/>                |                                                                                                                                                                                                                                                                                                                                                                                      |
| Mature Beans/Legumes |                                                                                                                                                                                                                                                                                                                                                                                      |
| <hr/>                |                                                                                                                                                                                                                                                                                                                                                                                      |
|                      | Beans or lentils, baked, dried or soup<br>Peas or lima beans (fresh, frozen, canned) or soup                                                                                                                                                                                                                                                                                         |
| <hr/>                |                                                                                                                                                                                                                                                                                                                                                                                      |
| Soy                  | Tofu, soy burger, soybeans, miso or other soy protein                                                                                                                                                                                                                                                                                                                                |
| <hr/>                |                                                                                                                                                                                                                                                                                                                                                                                      |
| Whole Grains         |                                                                                                                                                                                                                                                                                                                                                                                      |
| <hr/>                |                                                                                                                                                                                                                                                                                                                                                                                      |
|                      | Whole grain breakfast cereal<br>Other cooked breakfast cereal<br>Cooked Oatmeal<br>Dark Bread<br>Rye/Pumpernickle bread                                                                                                                                                                                                                                                              |

Crispbreads (e.g., Wasa)  
Brown Rice  
Other grains, e.g. bulgar, kasha, couscous, etc.  
Oat bran, added to food  
Other Bran, added to food  
Wheat Germ  
Regular popcorn  
Fat free/Light Popcorn  
Tortillas

---

**Supplementary Table 2:** Hazard Ratios (95% CI) for fatal CHD associated with quintiles of total, unprocessed, and processed red meat intake (N=43,272).

|                                | Quintile 1 | Quintile 2               | Quintile 3               | Quintile 4               | Quintile 5               | HR per 1 serving/d       | P-trend* |
|--------------------------------|------------|--------------------------|--------------------------|--------------------------|--------------------------|--------------------------|----------|
| <b>Total red meat</b>          |            |                          |                          |                          |                          |                          |          |
| Median servings/d              | 0.21       | 0.52                     | 0.78                     | 1.14                     | 1.72                     |                          |          |
| Cases/PY                       | 329/204335 | 350/206578               | 362/204205               | 348/206600               | 471/204680               |                          |          |
| Age-adjusted Model             | 1          | 1.15 (0.99, 1.33)        | <b>1.24 (1.07, 1.44)</b> | <b>1.18 (1.02, 1.38)</b> | <b>1.63 (1.42, 1.87)</b> | <b>1.26 (1.18, 1.34)</b> | <0.001   |
| Multivariable-adjusted Model 1 | 1          | 1.13 (0.97, 1.32)        | <b>1.20 (1.03, 1.39)</b> | 1.12 (0.95, 1.31)        | <b>1.46 (1.24, 1.72)</b> | <b>1.19 (1.10, 1.28)</b> | <0.001   |
| Multivariable-adjusted Model 2 | 1          | 1.16 (0.99, 1.35)        | <b>1.23 (1.04, 1.44)</b> | 1.13 (0.95, 1.35)        | <b>1.38 (1.15, 1.66)</b> | <b>1.13 (1.03, 1.23)</b> | 0.003    |
| <b>Unprocessed red meat</b>    |            |                          |                          |                          |                          |                          |          |
| Median servings/d              | 0.14       | 0.35                     | 0.5                      | 0.71                     | 1.09                     |                          |          |
| Cases/PY                       | 355/206393 | 385/199832               | 332/207613               | 357/202472               | 431/210088               |                          |          |
| Age-adjusted Model             | 1          | <b>1.20 (1.04, 1.38)</b> | 1.07 (0.92, 1.24)        | <b>1.17 (1.01, 1.36)</b> | <b>1.47 (1.28, 1.70)</b> | <b>1.35 (1.22, 1.50)</b> | <0.001   |
| Multivariable-adjusted Model 1 | 1          | <b>1.19 (1.03, 1.38)</b> | 1.05 (0.90, 1.23)        | 1.13 (0.97, 1.32)        | <b>1.35 (1.15, 1.58)</b> | <b>1.25 (1.11, 1.41)</b> | 0.001    |
| Multivariable-adjusted Model 2 | 1          | <b>1.21 (1.04, 1.41)</b> | 1.08 (0.92, 1.27)        | 1.15 (0.97, 1.35)        | <b>1.29 (1.08, 1.53)</b> | <b>1.18 (1.04, 1.34)</b> | 0.02     |
| <b>Processed red meat</b>      |            |                          |                          |                          |                          |                          |          |
| Median servings/d              | 0.02       | 0.14                     | 0.21                     | 0.38                     | 0.71                     |                          |          |
| Cases/PY                       | 354/224944 | 332/182073               | 360/211873               | 333/201933               | 481/205575               |                          |          |
| Age-adjusted Model             | 1          | <b>1.18 (1.02, 1.38)</b> | <b>1.20 (1.04, 1.39)</b> | 1.14 (0.98, 1.32)        | <b>1.51 (1.32, 1.73)</b> | <b>1.38 (1.25, 1.52)</b> | <0.001   |
| Multivariable-adjusted Model 1 | 1          | <b>1.17 (1.00, 1.36)</b> | 1.15 (0.99, 1.34)        | 1.06 (0.91, 1.24)        | <b>1.29 (1.11, 1.50)</b> | <b>1.21 (1.08, 1.36)</b> | 0.005    |
| Multivariable-adjusted Model 2 | 1          | <b>1.18 (1.01, 1.38)</b> | 1.17 (0.99, 1.37)        | 1.09 (0.92, 1.28)        | <b>1.21 (1.02, 1.43)</b> | 1.11 (0.98, 1.26)        | 0.14     |

**Age-adjusted Model:** Adjusted for age and year of questionnaire return

**Multivariable-adjusted Model 1:** Adjusted for variables in Age-adjusted Model + race/ethnicity (white, black, Asian, other), marital status (married, divorced, widowed, never married), living arrangement (lives with family, lives alone, other arrangements), profession (dentist, pharmacist, optometrist, podiatrist, veterinary), work status (full time, part time, retired), smoking status (never smoker, past smoker, current 1 to 14 cigarettes per day, current 15 to 24 cigarettes per day, current  $\geq 25$  cigarettes per day), physical activity (< 3, 3-8.9, 9-17.9, 18-26.9, and  $\geq 27$  in metabolic equivalents per week), body mass index (< 21, 21-22.9, 23-24.9, 25-26.9, 27-29.9, 30-32.9, 33-34.9, 35-39.9,  $\geq 40$  in kg/m<sup>2</sup>), alcohol intake (0, 0.1-4.9, 5.0-9.9, 10-14.9, or  $\geq 15.0$  g per day), multivitamin use (yes, no), aspirin use (yes, no), family history of early CHD or stroke (diagnosis before 60 years of age; yes, no), and total energy intake (in quintiles).

**Multivariable-adjusted Model 2:** Adjusted for variables in Model 1 + intakes of poultry, fish, egg, high fat dairy, low fat dairy, nuts, legumes, soy, whole grains, fruits, vegetables, and coffee, and glycemic index

\* P-value when each quintile was assigned the median value and treated as a continuous variable

Abbreviations: CHD, Coronary Heart Disease; PY, Person-Years; HR, Hazard Ratio; CI, Confidence Interval

**Supplementary Table 3:** Hazard Ratios (95% CI) for total CHD associated with quintiles of total, unprocessed, and processed red meat intake after including baseline comorbidities or a modified alternative healthy eating index (AHEI) score in the models.

|                                    | Quintile 1 | Quintile 2        | Quintile 3        | Quintile 4        | Quintile 5               |
|------------------------------------|------------|-------------------|-------------------|-------------------|--------------------------|
| <b>Total red meat</b>              |            |                   |                   |                   |                          |
| Median servings/d                  | 0.21       | 0.52              | 0.78              | 1.14              | 1.72                     |
| Cases/PY                           | 811/203879 | 833/206108        | 859/203718        | 865/206087        | 1087/204079              |
| Model 1* + baseline comorbidities  | 1          | 1.05 (0.95, 1.17) | 1.09 (0.99, 1.22) | 1.05 (0.94, 1.17) | <b>1.21 (1.07, 1.36)</b> |
| Model <sup>ψ</sup> + modified AHEI | 1          | 1.01 (0.92, 1.12) | 1.03 (0.93, 1.14) | 1.00 (0.90, 1.11) | <b>1.21 (1.08, 1.35)</b> |
| <b>Unprocessed red meat</b>        |            |                   |                   |                   |                          |
| Median servings/d                  | 0.14       | 0.35              | 0.5               | 0.71              | 1.09                     |
| Cases/PY                           | 847/205918 | 876/199361        | 840/207111        | 877/201942        | 1016/209540              |
| Model 1* + baseline comorbidities  | 1          | 1.09 (0.99, 1.21) | 1.04 (0.94, 1.15) | 1.08 (0.97, 1.20) | 1.11 (0.99, 1.25)        |
| Model <sup>ψ</sup> + modified AHEI | 1          | 1.07 (0.97, 1.17) | 0.99 (0.89, 1.09) | 1.03 (0.93, 1.14) | <b>1.14 (1.02, 1.27)</b> |
| <b>Processed red meat</b>          |            |                   |                   |                   |                          |
| Median servings/d                  | 0.02       | 0.14              | 0.21              | 0.38              | 0.71                     |
| Cases/PY                           | 889/224469 | 734/181661        | 883/211353        | 843/201440        | 1107/204950              |
| Model 1* + baseline comorbidities  | 1          | 1.02 (0.92, 1.13) | 1.08 (0.97, 1.19) | 1.07 (0.96, 1.19) | <b>1.15 (1.03, 1.28)</b> |
| Model <sup>ψ</sup> + modified AHEI | 1          | 0.98 (0.88, 1.08) | 1.01 (0.92, 1.12) | 0.97 (0.88, 1.07) | <b>1.12 (1.01, 1.24)</b> |

\*Adjusted for age, race/ethnicity (white, black, Asian, other), marital status (married, divorced, widowed, never married), living arrangement (lives with family, lives alone, other arrangements), profession (dentist, pharmacist, optometrist, podiatrist, veterinary), work status (full time, part time, retired), smoking status (never smoker, past smoker, current 1 to 14 cigarettes per day, current 15 to 24 cigarettes per day, current  $\geq 25$  cigarettes per day), physical activity (< 3, 3-8.9, 9-17.9, 18-26.9, and  $\geq 27$  in metabolic equivalents per week), body mass index (< 21, 21-22.9, 23-24.9, 25-26.9, 27-29.9, 30-32.9, 33-34.9, 35-39.9,  $\geq 40$  in kg/m<sup>2</sup>), alcohol intake (0, 0.1-4.9, 5.0-9.9, 10-14.9, or  $\geq 15.0$  g per day), multivitamin use (yes, no), aspirin use (yes, no), family history of early CHD or stroke (diagnosis before 60 years of age; yes, no), and total energy intake (in quintiles) in addition to intakes of poultry, fish, egg, high fat dairy, low fat dairy, nuts, legumes, soy, whole grains, fruits, vegetables, and coffee, and glycemic index

<sup>ψ</sup> Adjusted for variables in Model 1 excluding alcohol intake, poultry, fish, egg, high fat dairy, low fat dairy, nuts, legumes, soy, whole grains, fruits, and vegetables.

Modified AHEI score is the diet score of the Alternative Healthy Eating Index (AHEI), after excluding the red meat component.

**Supplementary Table 4:** Hazard Ratios (95% CI) for total CHD associated with replacement of 1 serving/day of total, unprocessed, and processed red meat with 1 serving/day of other protein sources and whole grains.

| <b>Total red meat</b>       | <b>HR (95% CI)</b> | <b>p-value</b> |
|-----------------------------|--------------------|----------------|
| Poultry                     | 0.92 (0.81, 1.05)  | 0.24           |
| Fish                        | 1.06 (0.95, 1.19)  | 0.31           |
| Eggs                        | 0.90 (0.81, 1.01)  | 0.07           |
| High-fat dairy              | 0.88 (0.82, 0.94)  | <0.001         |
| Low-fat dairy               | 0.89 (0.84, 0.95)  | <0.001         |
| Nuts                        | 0.89 (0.82, 0.96)  | 0.002          |
| Legumes                     | 0.82 (0.70, 0.96)  | 0.01           |
| Soy*                        | 0.67 (0.48, 0.93)  | 0.02           |
| Plant-based proteins        | 0.86 (0.80, 0.93)  | <0.001         |
| Whole grains                | 0.62 (0.53, 0.73)  | <0.001         |
| <b>Unprocessed Red meat</b> | <b>HR (95% CI)</b> | <b>p-value</b> |
| Poultry                     | 0.92 (0.79, 1.06)  | 0.24           |
| Fish                        | 1.05 (0.93, 1.20)  | 0.43           |
| Eggs                        | 0.93 (0.82, 1.05)  | 0.26           |
| High-fat dairy              | 0.89 (0.81, 0.97)  | 0.01           |
| Low-fat dairy               | 0.90 (0.82, 0.98)  | 0.02           |
| Nuts                        | 0.89 (0.81, 0.98)  | 0.02           |
| Legumes                     | 0.83 (0.70, 0.99)  | 0.03           |
| Soy*                        | 0.66 (0.48, 0.92)  | 0.01           |
| Plant-based proteins        | 0.87 (0.79, 0.95)  | 0.003          |
| Whole grains                | 0.61 (0.51, 0.72)  | <0.001         |
| <b>Processed Red Meat</b>   | <b>HR (95% CI)</b> | <b>p-value</b> |
| Poultry                     | 0.89 (0.77, 1.02)  | 0.10           |
| Fish                        | 1.01 (0.88, 1.15)  | 0.91           |
| Eggs                        | 0.87 (0.76, 0.99)  | 0.04           |
| High-fat dairy              | 0.85 (0.78, 0.93)  | <0.001         |
| Low-fat dairy               | 0.86 (0.79, 0.94)  | <0.001         |
| Nuts                        | 0.85 (0.77, 0.94)  | 0.001          |

|                      |                          |                  |
|----------------------|--------------------------|------------------|
| Legumes              | 0.80 (0.68, 0.95)        | 0.009            |
| Soy*                 | 0.66 (0.47, 0.91)        | 0.01             |
| Plant-based proteins | 0.83 (0.76, 0.91)        | <0.001           |
| <u>Whole grains</u>  | <u>0.59 (0.49, 0.69)</u> | <u>&lt;0.001</u> |

Models were adjusted for age, year of questionnaire return,, race/ethnicity (white, black, Asian, other), marital status (married, divorced, widowed, never married), living arrangement (lives with family, lives alone, other arrangements), profession ( dentist, pharmacist, optometrist, podiatrist, veterinary), work status (full time, part time, retired), smoking status (never smoker, past smoker, current 1 to 14 cigarettes per day, current 15 to 24 cigarettes per day, current  $\geq 25$  cigarettes per day), physical activity(< 3, 3-8.9, 9-17.9, 18-26.9, and  $\geq 27$  in metabolic equivalents per week), body mass index(< 21, 21-22.9, 23-24.9, 25-26.9, 27-29.9, 30-32.9, 33-34.9, 35-39.9,  $\geq 40$  in kg/m<sup>2</sup>), alcohol intake (0, 0.1-4.9, 5.0-9.9, 10-14.9, or  $\geq 15.0$  g per day), multivitamin use (yes, no), aspirin use (yes, no), family history of early CHD or stroke (diagnosis before 60 years of age; yes, no), and total energy intake (in quintiles), and intakes of poultry, fish, egg, high fat dairy, low fat dairy, nuts, legumes, soy (or combined plant protein sources of nuts, legumes, and soy), whole grains, fruits, vegetables, and coffee, and glycemic index.

Abbreviations: CHD, Coronary Heart Disease; HR, Hazard Ratio; CI, Confidence Interval

**Supplementary Figure 1: HRs (95% CI) for total CHD associated with replacement of 1 serving/day of total red meat with 1 serving/day of other protein sources, stratified by age and calendar year.**

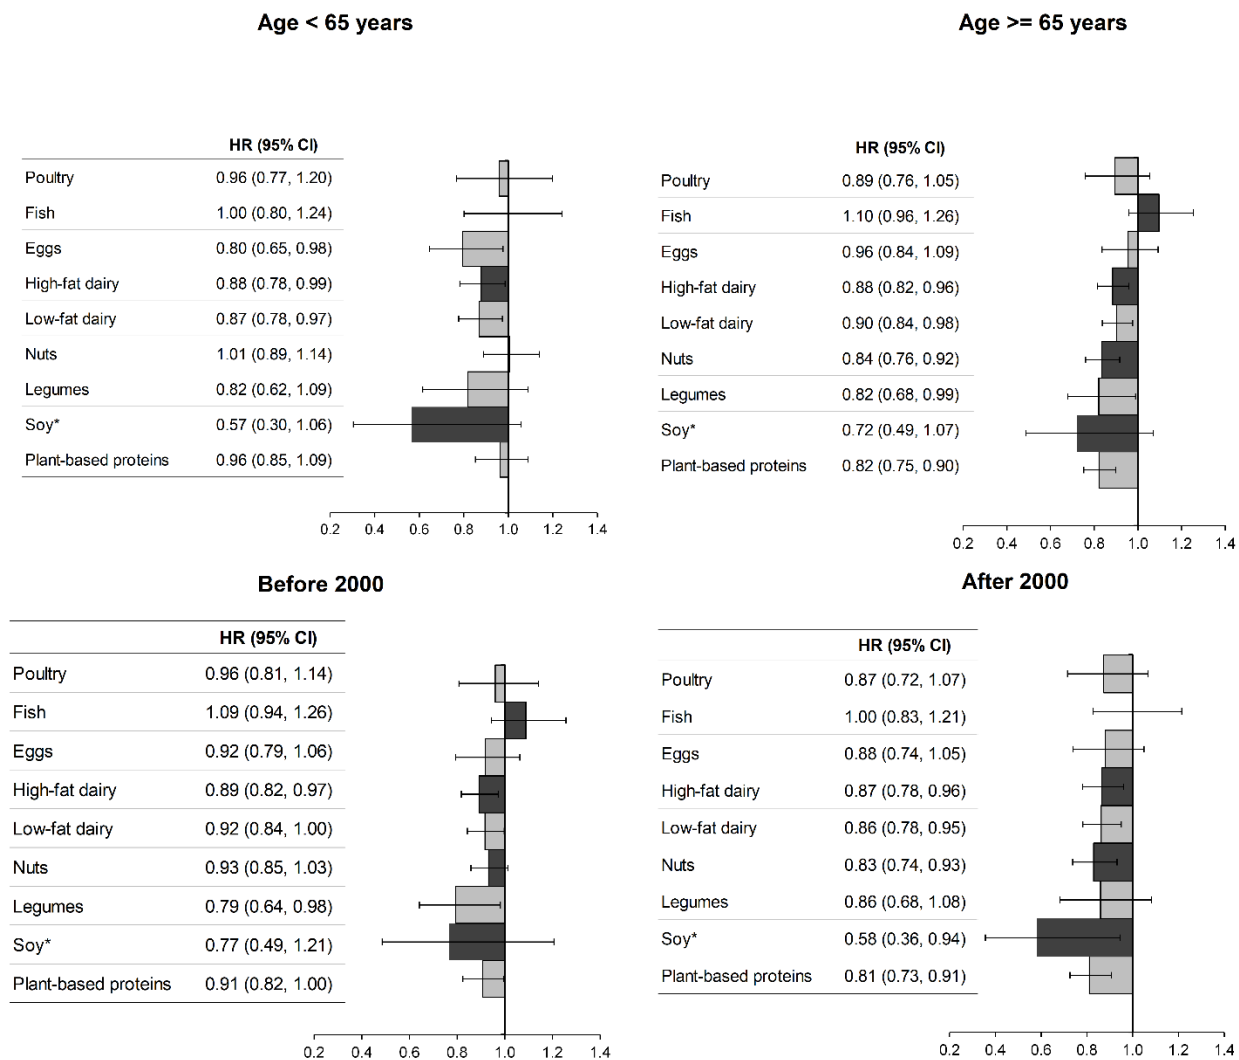



\* Replacing  $\geq 2$  servings/week of red meat with  $\geq 2$  servings/week of soy

One daily serving of nuts (28g); low-fat dairy products (240 ml milk, 28g cheese, or 120 ml yogurt); high fat dairy product (240 ml whole milk, 28g cream cheese, or 1 cup of regular ice cream); legumes (1/2 cup); whole grains (32 g (1 slice) of bread or 200 g (1 cup) of cooked brown rice or cereals);

Models were adjusted for age, year of questionnaire return, race/ethnicity (white, black, Asian, other), marital status (married, divorced, widowed, never married), living arrangement (lives with family, lives alone, other arrangements), profession (dentist, pharmacist, optometrist, podiatrist, veterinary), work status (full time, part time, retired), smoking status (never smoker, past smoker, current 1 to 14 cigarettes per day, current 15 to 24 cigarettes per day, current  $\geq 25$  cigarettes per day), physical activity (< 3, 3-8.9, 9-17.9, 18-26.9, and  $\geq 27$  in metabolic equivalents per week), body mass index (< 21, 21-22.9, 23-24.9, 25-26.9, 27-29.9, 30-32.9, 33-34.9, 35-39.9,  $\geq 40$  in kg/m<sup>2</sup>), alcohol intake (0, 0.1-4.9, 5.0-9.9, 10-14.9, or  $\geq 15.0$  g per day), multivitamin use (yes, no), aspirin use (yes, no), family history of early CHD or stroke (diagnosis before 60 years of age; yes, no), and total energy intake (in quintiles), and intake of poultry, fish, egg, high fat dairy, low fat dairy, nuts, legumes, soy (or combined plant protein sources of nuts, legumes, and soy), whole grains, fruits, vegetables, coffee, and glycemic index.

P-values for the interaction between total red meat and each of age and period was 0.48 and 0.45 respectively. The interactions between nuts and plant-based proteins with age were significant ( $p=0.002$  and  $0.004$ , respectively).

Abbreviations: CHD, Coronary Heart Disease; HR, Hazard Ratio; CI, Confidence Interval

**Supplementary Figure 2:** HRs (95% CI) for total CHD associated with replacement of 1 serving/day of total red meat with 1 serving/day of other protein sources, stratified by Body Mass Index (BMI) and total fiber intake.

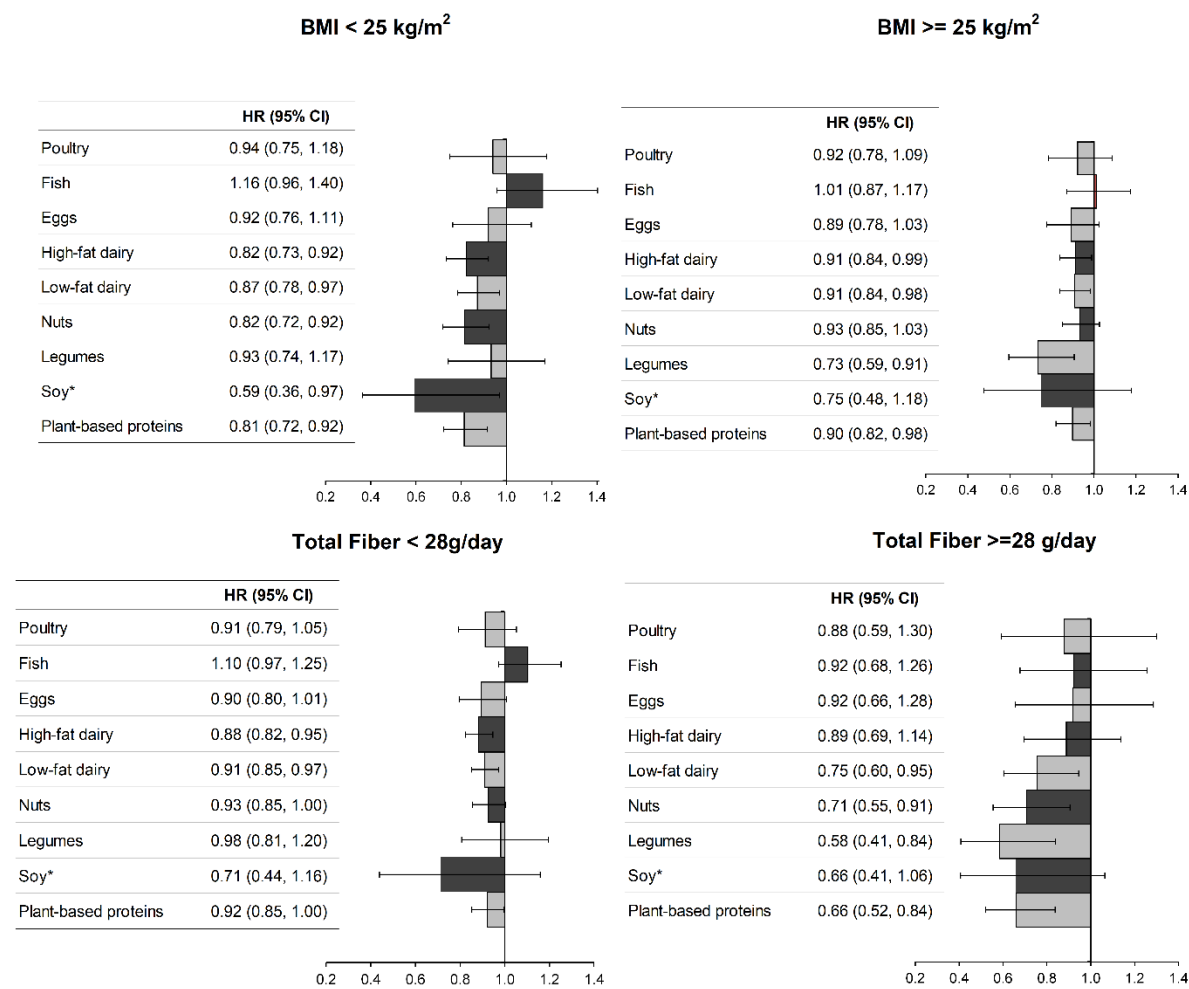

\* Replacing  $\geq 2$  servings/week of red meat with  $\geq 2$  servings/week of soy

One daily serving of nuts (28g); low-fat dairy products (240 ml milk, 28g cheese, or 120 ml yogurt); high fat dairy product (240 ml whole milk, 28g cream cheese, or 1 cup of regular ice cream); legumes (1/2 cup); whole grains (32 g (1 slice) of bread or 200 g (1 cup) of cooked brown rice or cereals);

Models were adjusted for age, year of questionnaire return, race/ethnicity (white, black, Asian, other), marital status (married, divorced, widowed, never married), living arrangement (lives with family, lives alone, other arrangements), profession (dentist, pharmacist, optometrist, podiatrist, veterinary), work status (full time, part time, retired), smoking status (never smoker, past smoker, current 1 to 14 cigarettes per day, current 15 to 24 cigarettes per day, current  $\geq 25$  cigarettes per day), physical activity (< 3, 3-8.9, 9-17.9, 18-26.9, and  $\geq 27$  in metabolic equivalents per week), body mass index (< 21, 21-22.9, 23-24.9, 25-26.9, 27-29.9, 30-32.9, 33-34.9, 35-39.9,  $\geq 40$  in kg/m<sup>2</sup>), alcohol intake (0, 0.1-4.9, 5.0-9.9, 10-14.9, or  $\geq 15.0$  g per day), multivitamin use (yes, no), aspirin use (yes, no), family history of early CHD or stroke (diagnosis before 60 years of age; yes, no), and total energy intake (in quintiles), and intake of poultry, fish, egg, high fat dairy, low fat dairy, nuts, legumes, soy (or combined plant protein sources of nuts, legumes, and soy), whole grains, fruits, vegetables, coffee, and glycemic index.

P-values for the interaction between total red meat and each of BMI and fiber intake was 0.30 and 0.28 respectively. The interactions between nuts, legumes, and plant-based proteins with fiber intake were significant (p=0.04, 0.006, and 0.000, respectively).

In the stratified analysis by BMI, models were adjusted for BMI as a continuous variable.

Abbreviations: CHD, Coronary Heart Disease; HR, Hazard Ratio; CI, Confidence Interval

**Supplementary Figure 3:** Hazard Ratios (95% CI) for total CHD associated with replacement of 1 serving/day of total red meat with 1 serving/day of other protein sources with different ways of modeling diet.

**A. Cumulative updating till major diseases develop (Primary Model)**

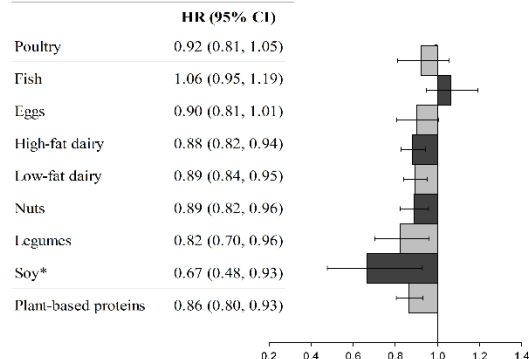

**B. Baseline Diet**

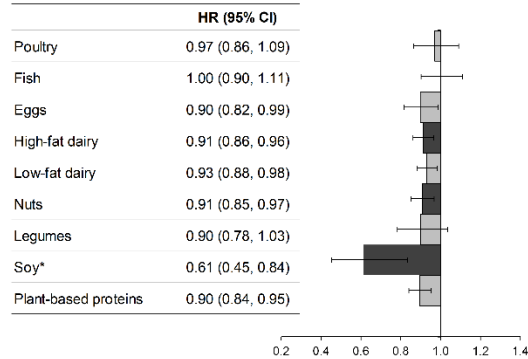

**C. Continuous Cumulative updating**

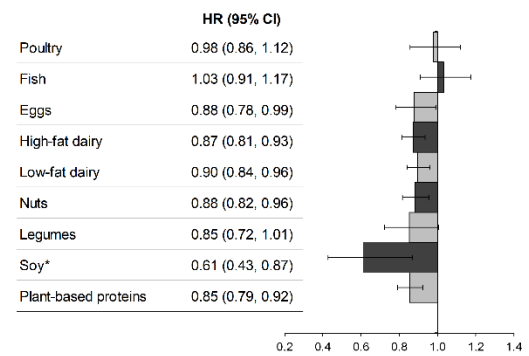

**D. Most recent Diet**

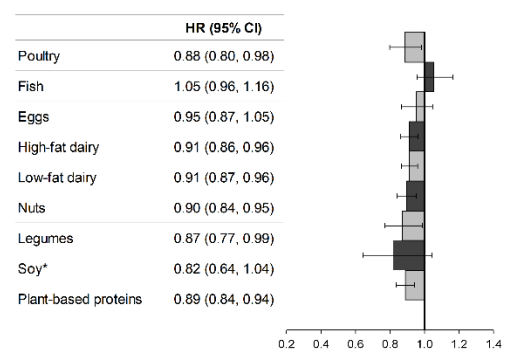

**E. Continuous Cumulative updating (adjusting for major diseases)**

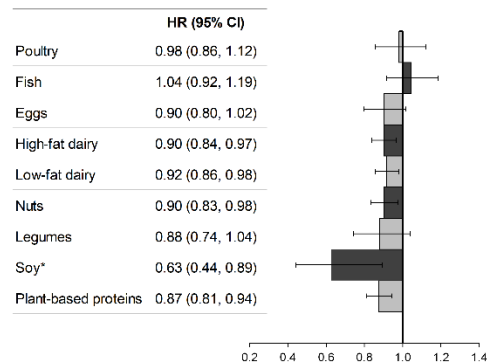

\* Replacing  $\geq 2$  servings/week of red meat with  $\geq 2$  servings/week of soy

One daily serving of nuts (28g); low-fat dairy products (240 ml milk, 28g cheese, or 120 ml yogurt); high fat dairy product (240 ml whole milk, 28g cream cheese, or 1 cup of regular ice cream); legumes (1/2 cup); whole grains (32 g (1 slice) of bread or 200 g (1 cup) of cooked brown rice or cereals);

Models were adjusted for age, year of questionnaire return, race/ethnicity (white, black, Asian, other), marital status (married, divorced, widowed, never married), living arrangement (lives with family, lives alone, other arrangements), profession (dentist, pharmacist, optometrist, podiatrist, veterinary), work status (full time, part time, retired), smoking status (never smoker, past smoker, current 1 to 14 cigarettes per day, current 15 to 24 cigarettes per day, current  $\geq 25$  cigarettes per day), physical activity (< 3, 3-8.9, 9-17.9, 18-26.9, and  $\geq 27$  in metabolic equivalents per week), body mass index (< 21, 21-22.9, 23-24.9, 25-26.9, 27-29.9, 30-32.9, 33-34.9, 35-39.9,  $\geq 40$  in kg/m<sup>2</sup>), alcohol intake (0, 0.1-4.9, 5.0-9.9, 10-14.9, or  $\geq 15.0$  g per day), multivitamin use (yes, no), aspirin use (yes, no), family history of early CHD or stroke (diagnosis before 60 years of age; yes, no), and total energy intake (in quintiles), and intake of poultry, fish, egg, high fat dairy, low fat dairy, nuts, legumes, soy (or combined plant protein sources of nuts, legumes, and soy), whole grains, fruits, vegetables, coffee, and glycemic index.

Major diseases included cancer, stroke, diabetes, angina, and coronary artery bypass grafting surgery. Panel A is identical to Figure 1 of the main manuscript.

Abbreviations: CHD, Coronary Heart Disease; HR, Hazard Ratio; CI, Confidence Interval.

**Supplementary Figure 4:** Hazard Ratios (95% CI) for total CHD associated with replacement of 1 serving/day of total red meat with 1 serving/day of other protein sources, with various lagged analyses incorporated into the cumulative update model.

**A. 0-4 years (N<sub>events</sub> =4456)**

|                      | HR (95% CI)       |
|----------------------|-------------------|
| Poultry              | 0.88 (0.80, 0.98) |
| Fish                 | 1.05 (0.96, 1.16) |
| Eggs                 | 0.95 (0.87, 1.05) |
| High-fat dairy       | 0.91 (0.86, 0.96) |
| Low-fat dairy        | 0.91 (0.87, 0.96) |
| Nuts                 | 0.90 (0.84, 0.95) |
| Legumes              | 0.87 (0.77, 0.99) |
| Soy*                 | 0.82 (0.64, 1.04) |
| Plant-based proteins | 0.89 (0.84, 0.94) |

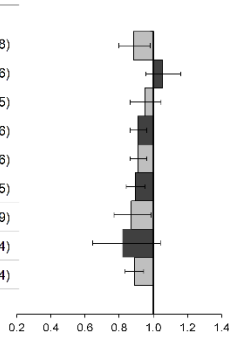

**B. 4-8 years (N<sub>events</sub> =4137)**

|                      | HR (95% CI)       |
|----------------------|-------------------|
| Poultry              | 0.96 (0.87, 1.07) |
| Fish                 | 0.99 (0.88, 1.10) |
| Eggs                 | 0.95 (0.86, 1.05) |
| High-fat dairy       | 0.93 (0.88, 0.99) |
| Low-fat dairy        | 0.92 (0.87, 0.98) |
| Nuts                 | 0.93 (0.87, 0.99) |
| Legumes              | 0.90 (0.79, 1.03) |
| Soy*                 | 0.63 (0.47, 0.83) |
| Plant-based proteins | 0.91 (0.86, 0.97) |

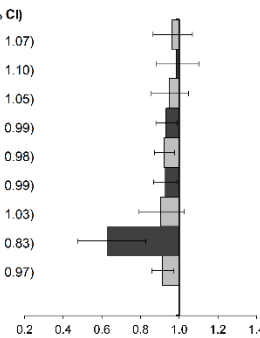

**C. 8-12 years (N<sub>events</sub> =3529)**

|                      | HR (95% CI)       |
|----------------------|-------------------|
| Poultry              | 0.96 (0.85, 1.08) |
| Fish                 | 1.00 (0.89, 1.13) |
| Eggs                 | 0.95 (0.85, 1.06) |
| High-fat dairy       | 0.95 (0.89, 1.02) |
| Low-fat dairy        | 0.94 (0.88, 1.00) |
| Nuts                 | 0.93 (0.87, 1.00) |
| Legumes              | 0.99 (0.86, 1.13) |
| Soy*                 | 0.81 (0.61, 1.07) |
| Plant-based proteins | 0.93 (0.87, 1.00) |

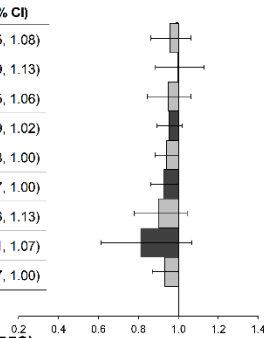

**D. 12-16 years (N<sub>events</sub> =2683)**

|                      | HR (95% CI)       |
|----------------------|-------------------|
| Poultry              | 0.86 (0.75, 1.00) |
| Fish                 | 0.88 (0.76, 1.02) |
| Eggs                 | 0.94 (0.82, 1.07) |
| High-fat dairy       | 0.90 (0.84, 0.98) |
| Low-fat dairy        | 0.92 (0.86, 0.99) |
| Nuts                 | 0.87 (0.80, 0.95) |
| Legumes              | 0.92 (0.78, 1.08) |
| Soy*                 | 0.98 (0.72, 1.35) |
| Plant-based proteins | 0.88 (0.81, 0.95) |

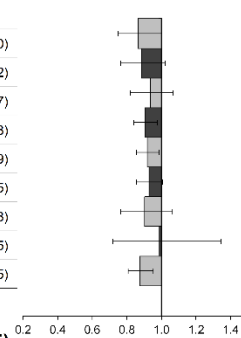

**E. 16-20 years (N<sub>events</sub> =1752)**

|                      | HR (95% CI)       |
|----------------------|-------------------|
| Poultry              | 0.85 (0.71, 1.02) |
| Fish                 | 0.93 (0.79, 1.10) |
| Eggs                 | 0.85 (0.72, 1.00) |
| High-fat dairy       | 0.85 (0.78, 0.93) |
| Low-fat dairy        | 0.83 (0.76, 0.91) |
| Nuts                 | 0.86 (0.77, 0.96) |
| Legumes              | 0.97 (0.80, 1.17) |
| Soy*                 | 0.68 (0.43, 1.06) |
| Plant-based proteins | 0.87 (0.78, 0.96) |

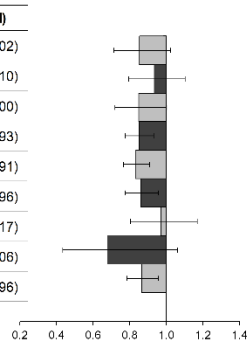

**F. 20-24 years (N<sub>events</sub> =1015)**

|                      | HR (95% CI)       |
|----------------------|-------------------|
| Poultry              | 1.08 (0.87, 1.32) |
| Fish                 | 0.89 (0.70, 1.12) |
| Eggs                 | 0.82 (0.65, 1.02) |
| High-fat dairy       | 0.86 (0.76, 0.98) |
| Low-fat dairy        | 0.90 (0.80, 1.02) |
| Nuts                 | 0.83 (0.71, 0.95) |
| Legumes              | 1.09 (0.86, 1.38) |
| Soy*                 | 0.92 (0.55, 1.55) |
| Plant-based proteins | 0.86 (0.75, 0.98) |

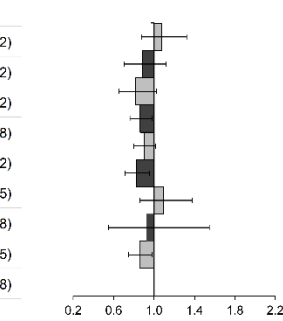

\* Replacing  $\geq 2$  servings/week of red meat with  $\geq 2$  servings/week of soy

One daily serving of nuts (28g); low-fat dairy products (240 ml skimmed milk, 28g cheese, or 120 ml yogurt); high fat dairy product (240 ml whole milk, 28g cream cheese, or 1 cup of regular ice cream); legumes (1/2 cup); whole grains (32 g (1 slice) of bread or 200 g (1 cup) of cooked brown rice or cereals); Models were adjusted for age, year of questionnaire return, race/ethnicity (white, black, Asian, other), marital status (married, divorced, widowed, never married), living arrangement (lives with family, lives alone, other arrangements), profession (dentist, pharmacist, optometrist, podiatrist, veterinary), work status (full time, part time, retired), smoking status (never smoker, past smoker, current 1 to 14 cigarettes per day, current 15 to 24 cigarettes per day, current  $\geq 25$  cigarettes per day), physical activity (< 3, 3-8.9, 9-17.9, 18-26.9, and  $\geq 27$  in metabolic equivalents per week), body mass index (< 21, 21-22.9, 23-24.9, 25-26.9, 27-29.9, 30-32.9, 33-34.9, 35-39.9,  $\geq 40$  in kg/m<sup>2</sup>), alcohol intake (0, 0.1-4.9, 5.0-9.9, 10-14.9, or  $\geq 15.0$  g per day), multivitamin use (yes, no), aspirin use (yes, no), family history of early CHD or stroke (diagnosis before 60 years of age; yes, no), and total energy intake (in quintiles), and intake of poultry, fish, egg, high fat dairy, low fat dairy, nuts, legumes, soy (or combined plant protein sources of nuts, legumes, and soy), whole grains, fruits, vegetables, coffee, and glycemic index.

Abbreviations: CHD, Coronary Heart Disease; HR, Hazard Ratio; CI, Confidence Interval
